# Supplementary material
Source: PubMed Central journal article supplement (PMC3421983)

## Haemoglobin modulates salicylate and jasmonate/ethylene-mediated resistance mechanisms against pathogens

*Luis A J Mur, Anushen Sivakumaran, Julien Mandon, Simona M Cristescu, Frans J M Harren, and Kim H Hebelstrup*

**Supplementary Figure 1:** Arabidopsis rosettes used to assess trace gas emissions following pathogen attack.

Arabidopsis rosettes of Col-0 and the Glb line photographed prior to measurement of trace gas measurements using either the Quantum Cascade Laser (for NO) or laser photoacoustic detector (for ethylene). Bar = 1 cm

**Supplementary Figure 2:** The Quantum Cascade Laser (QCL)-based sensor adapted for Nitric Oxide detection.

A quantum cascade laser (QCL) emitting around  $1900\text{ cm}^{-1}$  wavelength passes through a multi-pass cell where the NO released by the biological samples is transported with a carrier flow of air via gas tubing to the multi-pass cell at a flow rate of 1 L/h. The intensity of the laser ( $I_0$ ) is strongly attenuated due to the NO absorption of the light in the multi-pass cell (effective path length  $L = 76\text{ m}$ ), following the Beer–Lambert law. The detected signal ( $I$ ) depends of the laser intensity ( $I_0$ ), the absorption path length ( $L$ ) and the molar absorption coefficient ( $\epsilon$ ) of NO at this wavelength. The NO concentration is calculated by measuring the attenuation of the light ( $I/I_0$ ).

**Supplementary Figure 3:** Glb1 and Glb2 expression in the over-expression lines.

Detection of Glb1 and Glb2 protein accumulation in protein extracts from mature rosettes of Col-0, 35S-GLB1 and 35S-GLB2. Note the over-accumulation of GLB1 in 35S-GLB1 and GLB2 in 35S-GLB2 lines.

**Supplementary Figure 4:** Nitric oxide, salicylic acid and ethylene production and from *Arabidopsis* lines with modified hemoglobin expression on inoculation with *Pseudomonas syringae* pv. *tomato*.

**(A)** NO production was determined from *Arabidopsis* Col-0 and the hemoglobin (Hb) *GLB11* RNAi suppressed *Arabidopsis* line *glb1* and the CaMV 35S- *GLB11* over-expression line, following inoculation with virulent *Pseudomonas syringae* pv. *tomato* (*Pst*) DC3000 strains. NO was determined using a Quantum Cascade Laser system. **(B)** Salicylic acid accumulation at 48 h post inoculation of *Arabidopsis* Col-0, *glb1* and 35S-*GLB1* with *Pst* (grey bar) or mock-inoculated with 10 mM MgCl<sub>2</sub> (White bar). Results are given as mean μmol SA (n = 6) per g fresh weight (g fwt) ± SE. Statistical comparison was made between inoculated Col-0 with *glb1* or 35S-*GLB1* plants and also between mock-inoculated and *glb1* or 35S-*GLB1* plants. Levels of significant are indicated: NS = no significant difference; \* *P* < 0.05, \*\* *P* < 0.01 and \*\*\* *P* < 0.001. **(C)** Ethylene production was determined using laser photoacoustic detection (LPAD) from *Arabidopsis* Col-0 and *glb1* and 35S-*GLB11* following inoculation *Pst*.

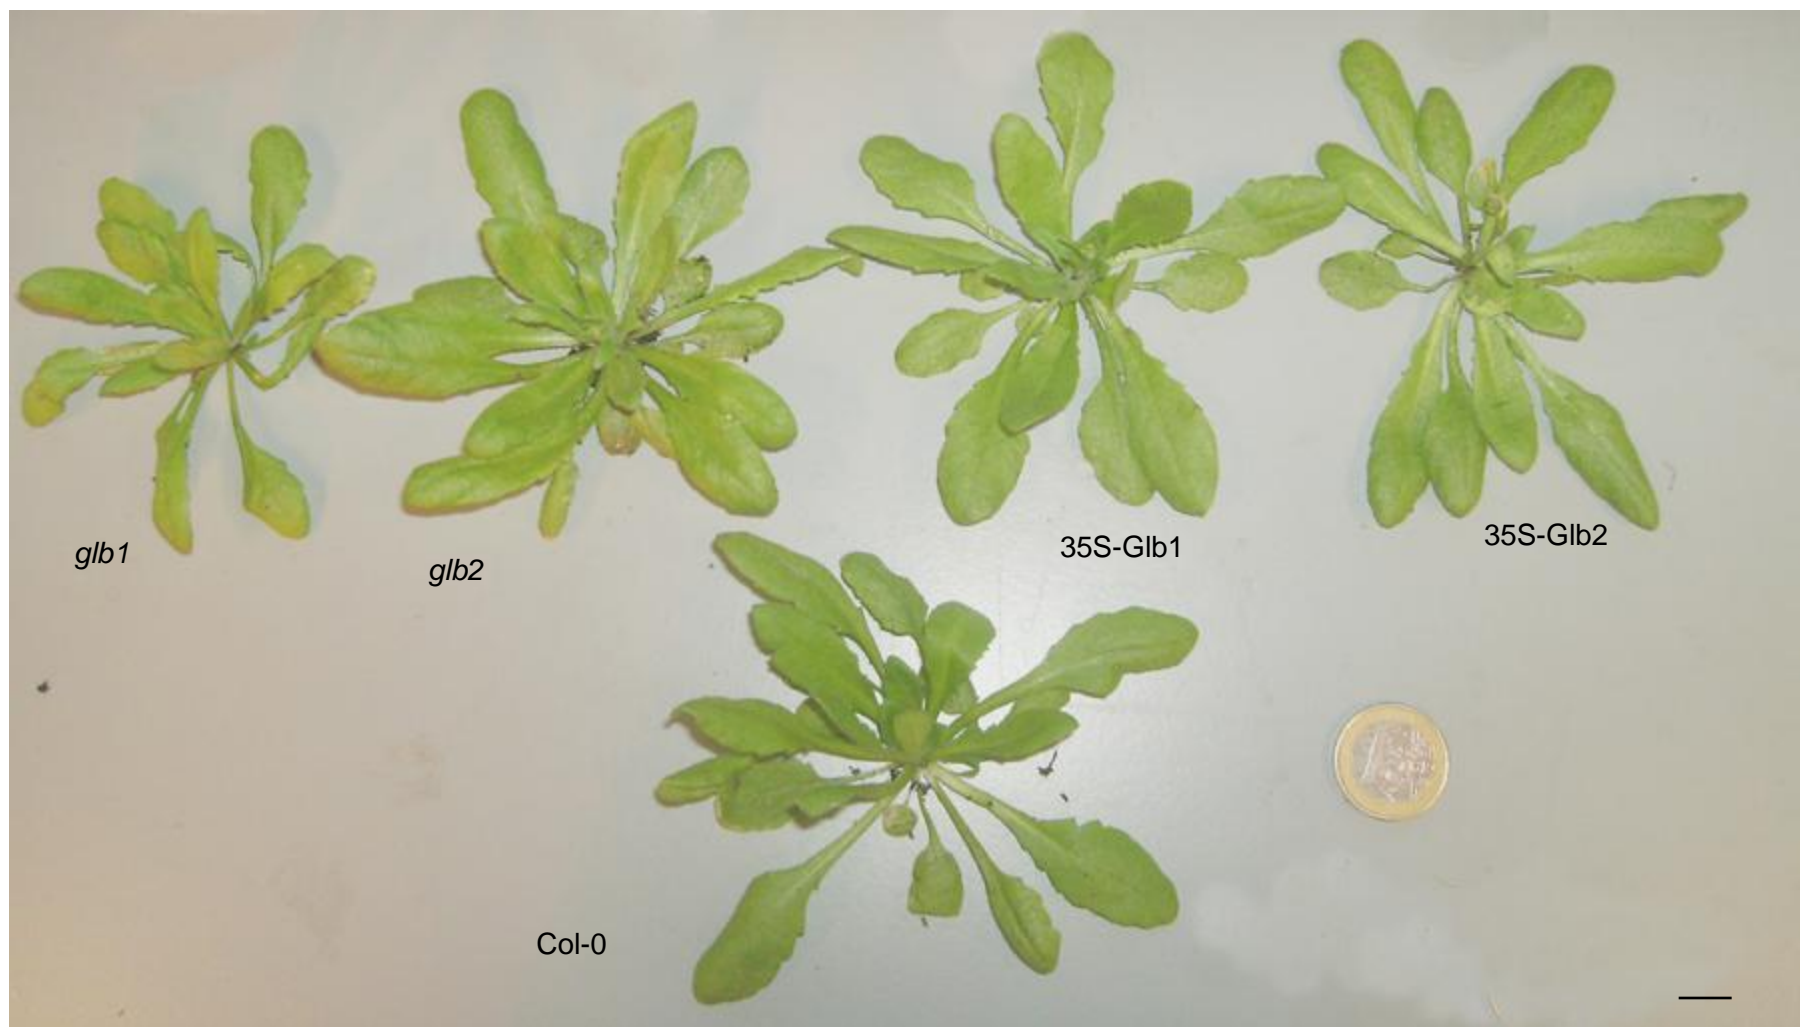

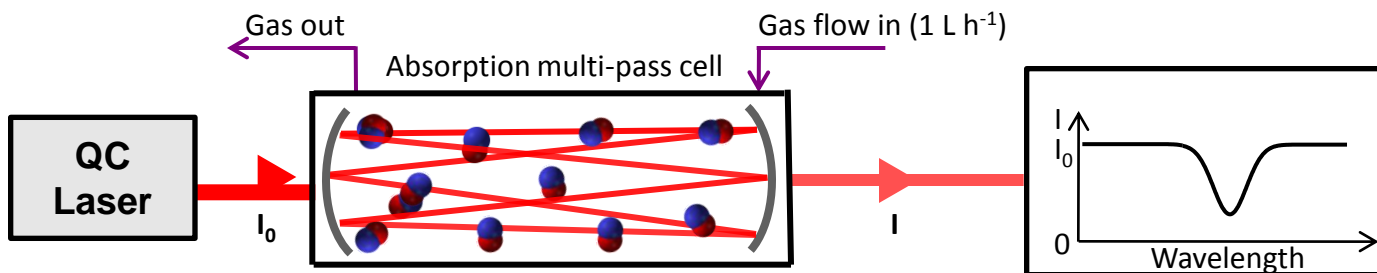

### Beer Lambert law

$$I = I_0 \times \exp(-\epsilon \times C \times L)$$

$I$  = transmitted laser intensity

$I_0$  = incident laser intensity

$\epsilon$  = molar absorption coefficient

$L$  = absorption length

$C$  = NO concentration

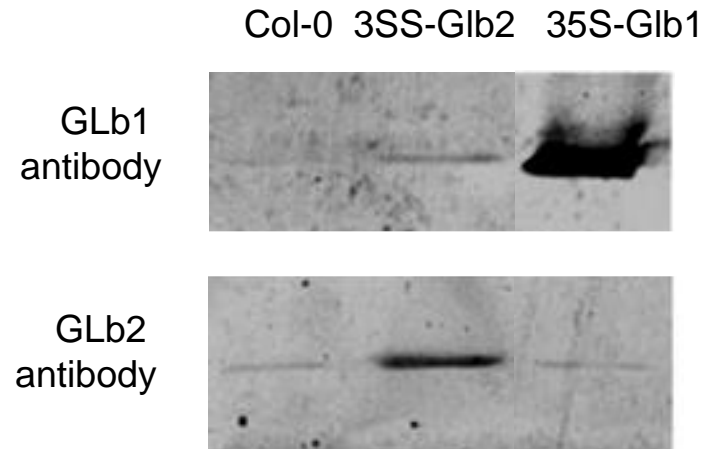

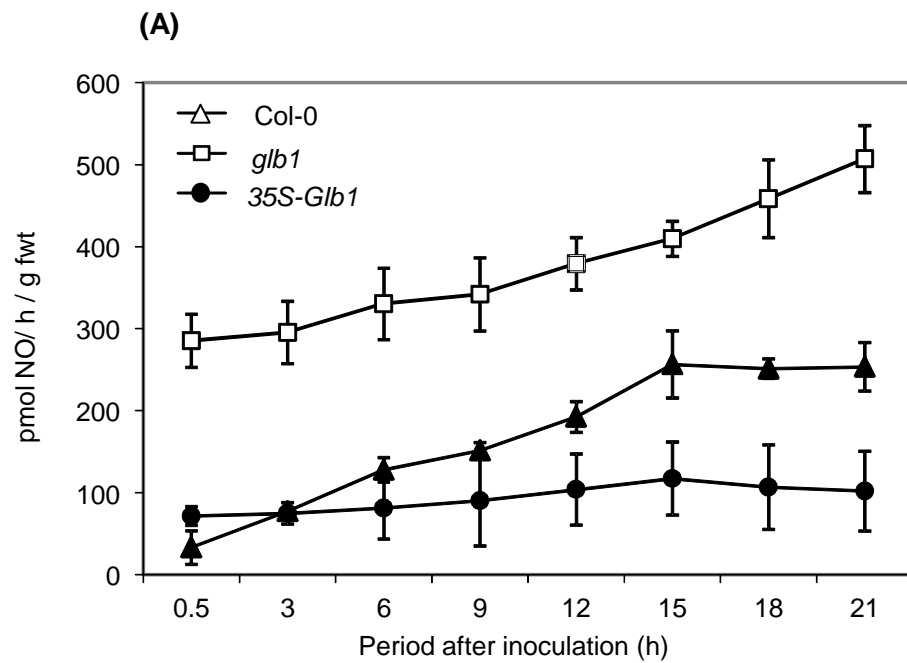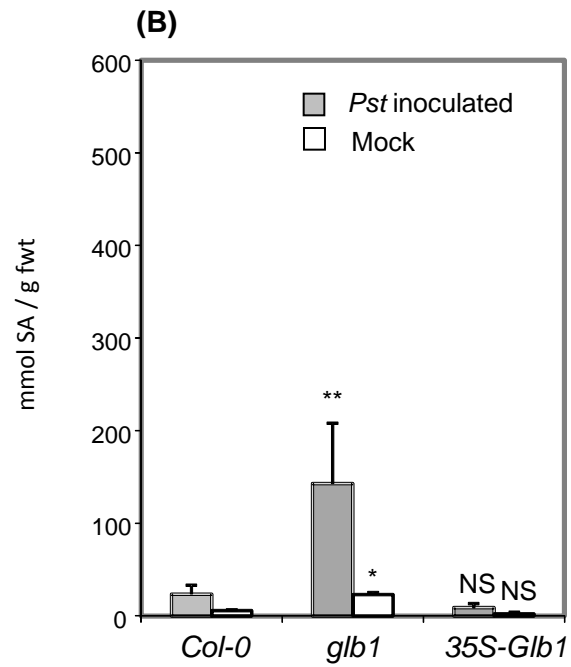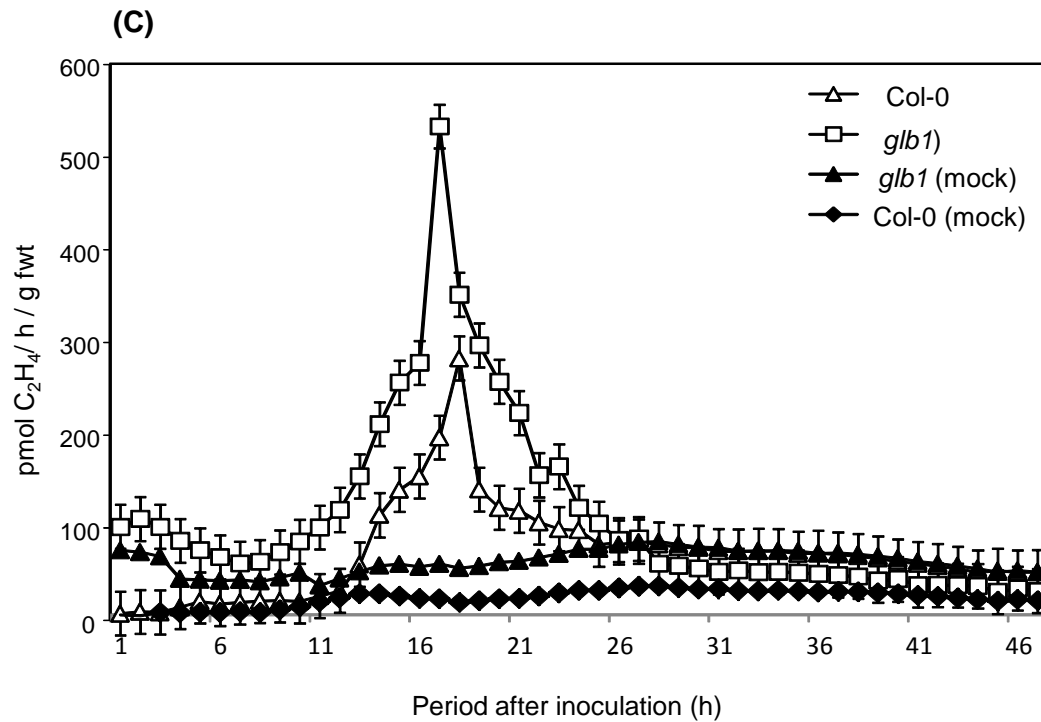

Supplement: supp_ers116_00078006_file001.pdf [file supp_ers116_00078006_file001.pdf]
